# Supplementary material for: Characterization of PdCP1, a serine carboxypeptidase from Pseudogymnoascus destructans, the causal agent of White-nose Syndrome
Source: publisher site journal article supplement (doi:10.1515/hsz-2018-0240), 2018-10-26
Supplement: Supplementary file 1 [file hsz-2018-0240_suppl.zip]

## Sheet: 10^5 filtered,2 of 3 reps,pep#
	Replicate 1					Replicate 2					Replicate 3
Acc #	Num Unique	Peptide Count	% Cov	Best Disc Score	Best Expect Val	Num Unique	Peptide Count	% Cov	Best Disc Score	Best Expect Val	Num Unique	Peptide Count	% Cov	Best Disc Score	Best Expect Val	Protein MW	Protein Name
VE01_02776-T1	49	58	31.2	12.21	5.2e-22	54	69	30	11.82	2.8e-21	46	52	24.2	12.51	1.5e-22	215848	VE01_02776-T1
VE01_05992-T1	30	42	42.1	10.81	2.1e-19	31	40	43.3	10.37	1.3e-18	30	42	35.9	10.32	1.7e-18	86864.2	VE01_05992-T1
VE01_05095-T1	20	22	28.3	8.79	1.1e-15	31	44	35.7	8.7	1.7e-15	15	16	18.5	7.18	1.1e-12	102362	VE01_05095-T1
VE01_05425-T1	17	33	48.3	13.57	1.6e-24	14	28	42.4	13.6	1.4e-24	11	24	36.2	13.22	7.2e-24	43677.3	VE01_05425-T1
VE01_05195-T1	14	24	47.6	10.83	1.9e-19	20	26	46.6	11.03	8.1e-20	17	21	42.9	11.49	1.1e-20	49665.5	VE01_05195-T1
VE01_04855-T1	22	23	31.5	10	6.6e-18	12	12	14.9	8.08	2.4e-14	8	8	9.4	6.89	3.8e-12	98605.5	VE01_04855-T1
VE01_02280-T1	13	14	18	8.59	2.6e-15	21	25	33.2	11.11	5.6e-20	13	14	17.2	9.35	1.1e-16	89758.6	VE01_02280-T1
VE01_06555-T1	20	24	39.9	12.4	2.4e-22	11	11	16.8	6.61	1.2e-11	4	4	5.4	2.64	5.7e-06	65042.1	VE01_06555-T1
VE01_05351-T1	15	23	50.4	11.36	2e-20	12	15	36.1	10.25	2.3e-18	10	12	27.8	10.48	8.3e-19	42975.3	VE01_05351-T1
VE01_03133-T1	18	24	69.3	11.37	1.9e-20	11	12	34.5	9.27	1.5e-16	10	13	24.9	8.96	5.4e-16	37684	VE01_03133-T1
VE01_07389-T1	12	16	59.4	9.87	1.2e-17	17	21	73.5	9.01	4.4e-16	6	6	22	7.18	1.1e-12	32467.1	VE01_07389-T1
VE01_08417-T1	12	31	37.8	10.98	1e-19	14	47	39	11.3	2.6e-20	12	37	37.8	13.14	1e-23	34138.9	VE01_08417-T1
VE01_06376-T1	15	16	17.1	10.32	1.7e-18	16	17	20.9	10.52	7.2e-19	11	13	13.1	12.7	6.5e-23	117854	VE01_06376-T1
VE01_07963-T1	16	17	46.5	10.81	2.1e-19	8	9	23.5	10.61	4.9e-19	5	6	13.2	11.05	7.3e-20	47203.5	VE01_07963-T1
VE01_00201-T1	14	20	45.7	9.8	1.6e-17	10	13	37.2	10.29	1.9e-18	4	4	14.9	8.27	1e-14	46936.9	VE01_00201-T1
VE01_06806-T1	15	16	32.7	13.08	1.3e-23	10	11	20.4	9.66	2.8e-17	7	7	10.3	5.69	6.2e-10	72223.5	VE01_06806-T1
VE01_02953-T1	3	3	7.8	6.36	3.7e-11	13	16	34.5	14.92	5.2e-27		1				47693.4	VE01_02953-T1
VE01_06488-T1	12	14	36.9	13.57	1.6e-24	5	6	13	12.28	3.8e-22	3	3	5.2	4.35	1.9e-07	57537.9	VE01_06488-T1
VE01_06819-T1	15	18	28.9	9.16	2.3e-16	14	16	25.6	9.76	1.8e-17	8	9	11.1	5.95	2.1e-10	72489.1	VE01_06819-T1
VE01_05479-T1	10	15	27	11.93	1.7e-21	11	15	27.9	11.77	3.4e-21	7	9	19.5	11.16	4.6e-20	57360.9	VE01_05479-T1
VE01_06761-T1	8	13	56.4	9.83	1.3e-17	10	35	57.1	13.93	3.4e-25	10	92	57.1	10.79	2.2e-19	13937	VE01_06761-T1
VE01_05856-T1	10	11	23.5	12.38	2.6e-22	8	10	17.7	9.29	1.3e-16	14	20	27.5	8.94	6e-16	69546.7	VE01_05856-T1
VE01_05199-T1	11	15	60.6	14.73	1.1e-26	9	10	40.2	13.92	3.6e-25	9	9	40.2	12.37	2.6e-22	25424.5	VE01_05199-T1
VE01_00443-T1	12	19	38.5	8.95	5.6e-16	10	14	34.5	9.18	2.1e-16	11	14	38.3	8.61	2.5e-15	42648.1	VE01_00443-T1
VE01_06509-T1	2	2	6.9	5.06	4.6e-09	8	13	30.6	6.34	3.9e-11	14	25	39.5	12.58	1.1e-22	26799.6	VE01_06509-T1
VE01_06516-T1	9	12	24.4	8.9	7e-16	13	15	29.7	8.97	5.2e-16	10	10	20.6	9.04	3.8e-16	67391	VE01_06516-T1
VE01_00429-T1	10	15	30.5	10.36	1.4e-18	9	10	30.1	14.84	7e-27	6	7	20.3	8.48	4.3e-15	46672.8	VE01_00429-T1
VE01_01013-T1	11	12	28.1	12.64	8.6e-23	4	4	10.1	7.08	1.7e-12	5	6	10.8	7.57	2.1e-13	60038.4	VE01_01013-T1
VE01_07557-T1	10	18	26.4	11.58	7.7e-21	9	17	19.4	9.37	9.7e-17	7	15	15.5	7.99	3.5e-14	45650	VE01_07557-T1
VE01_03196-T1	10	13	41.8	10.83	1.9e-19	10	12	43.8	10.13	3.7e-18	5	5	12.8	5.42	2e-09	40341.1	VE01_03196-T1
VE01_07152-T1	12	14	25.3	7.87	5.8e-14	1	1	1.7	6.86	7.7e-13	1	1	1.7	3.3	1.2e-07	76674.9	VE01_07152-T1
VE01_06546-T1	11	15	21	8.49	4.2e-15	8	14	17.3	8.46	4.7e-15	6	7	11.5	6.4	3e-11	70623.5	VE01_06546-T1
VE01_06364-T1	9	11	26.4	14.92	5e-27	9	10	21.8	14.47	3.4e-26	6	7	15.6	9.52	5e-17	56686.9	VE01_06364-T1
VE01_02747-T1	12	18	39.6	9.19	2.1e-16	13	18	36.8	8.31	8.8e-15	10	13	25.6	6.55	1.6e-11	41530.7	VE01_02747-T1
VE01_00132-T1	11	11	28.3	11.38	1.8e-20	7	10	19	11.02	8.3e-20	4	5	6.9	5.66	7.2e-10	63008.3	VE01_00132-T1
VE01_02196-T1	10	11	45.5	11.63	6.3e-21	11	13	43.6	11.99	1.3e-21	9	10	29.4	11.4	1.7e-20	32725.1	VE01_02196-T1
VE01_06978-T1	3	3	19.4	8.31	8.7e-15	11	12	74.8	9.2	2e-16	3	3	11.2	3.08	3e-07	26491.4	VE01_06978-T1
VE01_08061-T1	11	17	33.4	9.28	1.4e-16	11	17	32.1	10.28	2e-18	12	18	36	9.12	2.8e-16	40292.6	VE01_08061-T1
VE01_02707-T1	9	13	76.8	9.66	2.8e-17	3	3	18.8	7.06	1.9e-12						21906.2	VE01_02707-T1
VE01_07986-T1	3	3	7.9	9.35	1e-16	7	7	20.7	13.17	8.7e-24	10	10	25.9	8.63	2.3e-15	53249.7	VE01_07986-T1
VE01_04324-T1	11	11	25.3	8.62	2.3e-15	4	4	6.5	4.88	2e-08	2	2	2.7	3.85	1e-08	59882.3	VE01_04324-T1
VE01_02284-T1	9	9	26.3	9.94	8.6e-18	4	4	9.1	6.06	1.3e-10	3	3	6.1	7.05	1.9e-12	70530.2	VE01_02284-T1
VE01_05202-T1	9	10	27.3	10.79	2.2e-19	3	3	7.4	7.83	7e-14	2	2	4.1	6.29	4.8e-11	63723.7	VE01_05202-T1
VE01_07751-T1	5	5	19.1	5.75	4.9e-10	8	8	28.1	7.14	1.3e-12	11	12	51.1	7.62	1.7e-13	25259.7	VE01_07751-T1
VE01_03388-T1	6	22	52.9	9.47	6.4e-17	6	26	52.9	9.79	1.6e-17	8	62	64.7	10.93	1.2e-19	11255.7	VE01_03388-T1
VE01_02778-T1	8	10	18.2	7.5	2.8e-13	10	13	22.4	10.66	4e-19	9	14	22.4	10.35	1.5e-18	48054.7	VE01_02778-T1
VE01_07492-T1	8	12	53.6	13.72	8.3e-25	3	3	17.5	5.74	5.1e-10	3	3	9.5	8.13	1.9e-14	26029.6	VE01_07492-T1
VE01_09050-T1	10	14	37.2	10.07	4.8e-18	8	9	21	7.64	1.6e-13	10	11	23.2	9.36	1e-16	42099.8	VE01_09050-T1
VE01_06213-T1	5	13	19.8	11.59	7.4e-21	6	12	26.4	10.73	2.9e-19	3	7	12.9	10.54	6.5e-19	51295.6	VE01_06213-T1
VE01_05385-T1	11	16	30.4	9.07	3.5e-16	7	9	20.3	6.36	3.6e-11	9	10	23.4	6.58	1.4e-11	42395.3	VE01_05385-T1
VE01_02450-T1	8	10	58.1	8.87	8.2e-16	6	22	37.5	7.76	9.3e-14	6	17	37.5	7.83	6.9e-14	14626.8	VE01_02450-T1
VE01_04762-T1	6	7	25.8	9.4	8.4e-17	6	6	32.9	12.55	1.2e-22	5	5	27.4	9.21	1.9e-16	32696.2	VE01_04762-T1
VE01_04878-T1	6	6	31.4	11.1	5.9e-20	9	11	45	9.64	3.1e-17	4	4	16.7	8.12	2e-14	27970	VE01_04878-T1
VE01_01811-T1	8	8	12.4	8.84	9.2e-16	4	4	5.2	6.45	2.4e-11	3	3	3.8	4.85	8.5e-09	94181.6	VE01_01811-T1
VE01_00639-T1	8	9	15.3	9.75	1.9e-17	10	12	17.8	7.97	3.8e-14	10	11	17.8	8.68	1.8e-15	46886.6	VE01_00639-T1
VE01_03592-T1	4	4	26.9	11.36	2e-20	7	12	34	11.43	1.4e-20	5	11	27.4	10.41	1.1e-18	23508.3	VE01_03592-T1
VE01_04998-T1	6	12	24.3	11.55	8.7e-21	5	7	23.9	11.28	2.8e-20	6	10	26.8	11.88	2.2e-21	27956.4	VE01_04998-T1
VE01_03617-T1	6	9	36.3	10.55	6.3e-19	6	11	28.2	8.86	8.5e-16	6	11	28.2	8.52	3.6e-15	26265.6	VE01_03617-T1
VE01_08610-T1	7	7	18.2	8.12	1.9e-14	6	6	13.1	7.68	1.3e-13	4	4	6.7	6.77	6.3e-12	68006.2	VE01_08610-T1
VE01_02047-T1	6	9	20.4	8.13	1.9e-14	3	3	8.8	7.05	1.9e-12	2	2	5.9	6.31	4.5e-11	47350.2	VE01_02047-T1
VE01_08982-T1	3	3	6.9	6.31	4.4e-11	7	7	14.9	6.84	4.7e-12	9	9	17.7	5.64	7.6e-10	64986.1	VE01_08982-T1
VE01_06762-T1	5	7	23.5	9.02	4.3e-16	2	2	13.2	5.68	6.5e-10	2	3	7.5	9.01	4.5e-16	43151.7	VE01_06762-T1
VE01_02044-T1	3	3	7.3	5.14	5e-10	1	1	2.1	2.81	4.4e-06	7	7	22.2	8.5	4e-15	42714.7	VE01_02044-T1
VE01_00283-T1	4	6	46.7	17.73	3.1e-32	4	4	46.7	15.01	3.4e-27	4	8	46.7	16.01	4.8e-29	12792.7	VE01_00283-T1
VE01_00473-T1	4	7	26	11.94	1.7e-21	4	6	26	10.29	1.9e-18	4	5	26	9.61	3.4e-17	25545	VE01_00473-T1
VE01_05143-T1	6	6	19.8	7.24	8.4e-13	4	4	10.1	7.28	7e-13	5	5	12.8	7.44	3.5e-13	43291.7	VE01_05143-T1
VE01_06727-T1	3	3	8.6	5.38	2.3e-09	2	2	5.9	7.6	1.8e-13	7	7	16.5	8.81	1e-15	51768	VE01_06727-T1
VE01_08881-T1	4	4	23.8	5.93	2.3e-10	6	6	43.1	8.1	2.2e-14	5	5	31.5	5.82	3.5e-10	19496.1	VE01_08881-T1
VE01_08352-T1	5	6	34	9.36	1e-16	4	7	26.7	9.93	8.7e-18	5	8	34	9.19	2.1e-16	19882.4	VE01_08352-T1
VE01_00133-T1	3	3	9.2	8.39	6.2e-15	4	4	6.5	3.38	1.7e-07	9	9	15.8	6.17	2e-11	56209	VE01_00133-T1
VE01_05264-T1	5	5	46	11.45	1.3e-20	1	1	6.9	5.63	8e-10	2	2	12.2	5.22	4.5e-09	20639.7	VE01_05264-T1
VE01_08822-T1	4	6	12.5	7.89	5.4e-14	6	8	13	6.91	3.4e-12						55922.8	VE01_08822-T1
VE01_07612-T1	3	7	58.5	16.64	3.3e-30	4	12	59.6	18.87	2.4e-34	3	15	58.5	13.64	1.2e-24	9934.2	VE01_07612-T1
VE01_05790-T1	1	1	9.2	6.28	5.1e-11	5	6	43.9	11.94	1.7e-21	1	1	7.5	3.19	2.1e-07	16539.6	VE01_05790-T1
VE01_05850-T1	4	5	17.7	10.05	5.3e-18	1	1	2	3.45	7.4e-06						52271.7	VE01_05850-T1
VE01_00252-T1	1	1	2.8	2.84	2.1e-07						5	7	16.5	9.35	1e-16	41932.5	VE01_00252-T1
VE01_04401-T1	5	5	40.7	9.28	1.4e-16	2	2	10.2	5.22	4.6e-09						29784.4	VE01_04401-T1
VE01_02403-T1	4	4	22.5	8.69	1.8e-15	2	2	8.8	6.51	1.9e-11	2	2	8.8	7.02	2.1e-12	31390.8	VE01_02403-T1
VE01_00710-T1	3	3	11.4	7.75	9.8e-14						6	6	15.7	8.02	3e-14	42734	VE01_00710-T1
VE01_04945-T1	4	4	18.3	12.22	5.1e-22	2	2	7.9	5.95	2.9e-11	2	2	7.9	6.3	4.1e-11	25808.9	VE01_04945-T1
VE01_05051-T1	4	6	76.9	10.07	4.9e-18	2	2	13.8	6.53	1.7e-11		2				13002.7	VE01_05051-T1
VE01_07469-T1	4	7	27.8	9.13	2.7e-16	3	6	12.1	10.21	2.7e-18	3	4	12.1	8.84	9.1e-16	34193.6	VE01_07469-T1
VE01_07713-T1	6	7	10.5	9.53	4.9e-17	4	4	5.1	5.62	8.5e-10	2	2	2.4	4.5	2.3e-08	91323.5	VE01_07713-T1
VE01_02716-T1	4	4	27.8	7.87	5.7e-14	4	7	27.8	8.99	4.8e-16	2	3	8.1	6.69	8.8e-12	23507.8	VE01_02716-T1
VE01_07926-T1	3	3	7	7.2	1e-12	5	5	9.4	6.63	1.1e-11	6	6	10.6	6.21	7e-11	73699.1	VE01_07926-T1
VE01_04568-T1	2	2	57.1	14.08	1.8e-25	2	2	57.1	15.45	5.3e-28	2	3	57.1	17.88	1.7e-32	7523.8	VE01_04568-T1
VE01_01732-T1	5	9	21.2	6.99	2.4e-12	7	10	24.7	6.6	1.3e-11	7	12	24.7	7.44	3.6e-13	27725.8	VE01_01732-T1
VE01_03108-T1	1	1	10.9	5.97	3.2e-11	4	6	33.7	9.16	2.3e-16	4	9	33.7	9.12	2.7e-16	9756.9	VE01_03108-T1
VE01_06755-T1	4	4	66.4	8.68	1.8e-15	3	3	41.6	10.48	8.6e-19	1	1	8	4.49	1.1e-07	14508.5	VE01_06755-T1
VE01_05938-T1	3	3	21.5	11.49	1.1e-20	3	4	21.5	11.51	1.1e-20	3	5	21.5	11.01	8.7e-20	20605	VE01_05938-T1
VE01_03033-T1						3	3	9	11.11	5.7e-20	6	6	10.6	6.31	4.5e-11	68433.8	VE01_03033-T1
VE01_03504-T1						1	1	0.5	3.77	1.2e-08	5	5	2.9	7.35	5.3e-13	197006	VE01_03504-T1
VE01_01925-T1						6	6	19	7.56	2.1e-13	2	2	5.4	2.21	1e-06	34983.8	VE01_01925-T1
VE01_05800-T1	4	5	15.4	9.94	8.5e-18	2	2	4.2	2.17	8.2e-06	4	6	15.4	9.46	6.7e-17	36620.9	VE01_05800-T1
VE01_05126-T1	1	1	3.6	8.68	1.8e-15	3	3	9.3	12.98	2e-23	3	6	9.3	12.54	1.3e-22	40586.5	VE01_05126-T1
VE01_02502-T1	2	3	46.2	19.8	4.6e-36	1	1	25.5	13.39	3.4e-24						15150.6	VE01_02502-T1
VE01_06973-T1	1	1	5.3	4.92	1.6e-08	5	5	27.4	7.38	4.6e-13	3	3	15.9	8.12	2e-14	22684.1	VE01_06973-T1
VE01_06458-T1	4	5	8.4	7.56	2.2e-13	3	5	6.1	8.19	1.5e-14	1	1	2.4	7.99	3.4e-14	67431.9	VE01_06458-T1
VE01_02780-T1	4	4	26.6	10.44	9.8e-19	5	5	32	9.02	4.4e-16		1				25251.8	VE01_02780-T1
VE01_02701-T1	1	1	8.8	9.15	2.5e-16	4	5	18.8	8.1	2.2e-14						34135.8	VE01_02701-T1
VE01_03427-T1	4	4	19.6	7.22	9.2e-13	3	4	13.1	6.04	1.4e-10	1	1	3.3	5.65	7.4e-10	43762.9	VE01_03427-T1
VE01_05459-T1	1	1	10.5	5.36	2.5e-09	2	2	21.1	5.54	1.2e-09	4	4	50	6.9	3.6e-12	12468.1	VE01_05459-T1
VE01_01861-T1	3	3	8	6.79	5.7e-12	1	1	2.6	7.59	1.9e-13	3	3	8.5	7.72	1.1e-13	56039.5	VE01_01861-T1
VE01_04982-T1	4	5	27.6	6.66	1e-11	3	9	26.7	7.1	1.5e-12	3	10	26.7	7.75	9.7e-14	11952.8	VE01_04982-T1
VE01_02715-T1	4	5	15	6.94	3.1e-12	4	6	15	5.14	6.5e-09	4	8	15	5.58	1e-09	22004.9	VE01_02715-T1
VE01_08809-T1	4	4	9.7	7.47	3.2e-13	3	3	4.9	7.2	1e-12	4	4	5.4	4.12	1.9e-07	71664.8	VE01_08809-T1
VE01_01092-T1						4	4	15.1	6.55	1.6e-11	1	1	3.4	3.04	4.2e-07	33177.3	VE01_01092-T1
VE01_09038-T1	3	3	16.3	7.26	7.8e-13	4	4	17.9	6.3	4.7e-11	2	2	9.2	3.97	3e-07	21507.5	VE01_09038-T1
VE01_05132-T1	3	3	15.9	7.33	5.8e-13	2	3	6.1	4.74	3.6e-08	3	4	10.5	8.24	1.2e-14	41149	VE01_05132-T1
VE01_03624-T1	1	1	1.6	2.49	5.9e-07	1	1	1.6	2.42	7.5e-07	4	4	12.5	6.81	5.3e-12	39099.4	VE01_03624-T1
VE01_07730-T1	3	5	6	8.8	1.1e-15	2	4	4.2	8.89	7.5e-16	3	4	5.5	7.09	1.2e-12	63019.2	VE01_07730-T1
VE01_01168-T1	3	3	12.6	8.06	2.6e-14						1	1	2	3.12	5.5e-07	47801.8	VE01_01168-T1
VE01_08297-T1	3	3	13.5	7.72	1.1e-13	4	4	15.5	7.57	2e-13	4	5	15.5	6.53	1.7e-11	41068	VE01_08297-T1
VE01_08127-T1	1	1	5.2	5.21	4.8e-09	3	3	22.9	8.54	3.3e-15	1	1	5.2	5.32	3e-09	23243	VE01_08127-T1
VE01_00761-T1	2	3	14.4	6.97	2.7e-12	4	5	18.7	7.01	2.2e-12	3	3	14.4	5.63	8.1e-10	20140.9	VE01_00761-T1
VE01_00516-T1						4	4	20.1	4.9	1.8e-08	2	2	9.1	3.87	2.5e-07	22701.6	VE01_00516-T1
VE01_04418-T1	2	2	4.8	5.25	4e-09	1	1	1.3	4.17	1.7e-08	4	4	7.2	5.24	7.7e-10	64879.5	VE01_04418-T1
VE01_04925-T1	4	4	9.7	4.87	2.1e-08	1	1	2.4	4.27	2.6e-07						56720.7	VE01_04925-T1
VE01_08741-T1	2	4	7	8.71	1.6e-15	2	5	7	9.01	4.4e-16	2	4	7	8.3	9.1e-15	26072.1	VE01_08741-T1
VE01_08580-T1	2	2	14.5	6.49	2.1e-11	2	2	19.5	10.32	1.7e-18	1	1	10.9	9.64	3e-17	21701.9	VE01_08580-T1
VE01_07214-T1	2	2	17.5	8.75	1.3e-15	1	1	6.9	9.59	3.8e-17	1	1	6.9	8.94	6e-16	17996	VE01_07214-T1
VE01_08424-T1	4	4	11.1	4.59	6.9e-08	4	4	15.5	6.07	1.2e-10	3	3	8.5	5.1	7.6e-09	35692.8	VE01_08424-T1
VE01_00003-T1	2	2	12	9.66	2.8e-17	1	1	5.8	5.36	1.4e-09						27525.9	VE01_00003-T1
VE01_00679-T1						4	4	8.8	5.73	2.2e-10	1	1	1.6	0.8	8.3e-06	61307.6	VE01_00679-T1
VE01_02884-T1	3	3	8.5	6.47	2.2e-11	4	4	8.5	5.13	6.9e-09	4	4	7.7	4.66	5e-08	53819	VE01_02884-T1
VE01_03503-T1	3	3	3.9	6.67	9.4e-12	2	2	2.3	4.46	2.9e-08	3	3	4	4.18	5.5e-08	91526.8	VE01_03503-T1
VE01_01505-T1						2	2	12.5	11.36	2e-20	2	2	3.6	3.07	2.4e-07	46263.6	VE01_01505-T1
VE01_07248-T1	1	2	13.1	7.54	2.3e-13	3	3	30.8	7.04	2e-12	1	1	9.3	3.93	1.2e-06	11903.8	VE01_07248-T1
VE01_08339-T1						3	3	7.8	5.82	3.5e-10	2	2	5	5.19	1.7e-09	43262	VE01_08339-T1
VE01_00423-T1	2	2	34.3	8.07	2.5e-14	2	3	34.3	5.3	3.3e-09	1	2	11.1	5.39	2.3e-09	10604.3	VE01_00423-T1
VE01_06361-T1	2	2	9.6	8.44	5.1e-15	1	1	4.5	7.31	6.1e-13						38769.3	VE01_06361-T1
VE01_00419-T1	3	3	8.1	4.74	3.6e-08	3	3	8.1	5.35	2.7e-09	1	1	2.9	3.86	8e-07	36314.3	VE01_00419-T1
VE01_01908-T1	3	4	12	6.96	2.7e-12	3	3	12	6.27	5.3e-11	3	3	12	6.2	7.1e-11	23862.5	VE01_01908-T1
VE01_07731-T1	1	1	4.4	6.33	4.1e-11	2	2	9.1	8.05	2.7e-14	1	1	3.8	5.01	1.1e-08	34685.6	VE01_07731-T1
VE01_00397-T1	2	2	16.5	8.18	1.5e-14	2	2	13.4	6.06	1.1e-11						25435.4	VE01_00397-T1
VE01_05243-T1	3	3	21.9	4.75	3.4e-08	2	2	13.5	2.36	9.4e-07						16799.1	VE01_05243-T1
VE01_09010-T1	2	4	14.9	6.6	1.3e-11	2	3	14.9	6.38	3.3e-11	2	2	14.9	4.72	1.1e-08	20950.6	VE01_09010-T1
VE01_08262-T1						4	4	14.5	4.15	7.2e-08	2	2	6.9	2.97	1.2e-06	29374.1	VE01_08262-T1
VE01_06422-T1	3	3	15.4	5.07	5.4e-09	3	3	15.4	5.48	6e-10		1				17914	VE01_06422-T1
VE01_08806-T1	1	1	17.8	11.59	7.3e-21	1	1	17.8	10.73	2.9e-19	1	1	17.8	8.6	2.6e-15	15303.6	VE01_08806-T1
VE01_01585-T1	2	2	10.9	7.59	1.9e-13	1	1	8	7.54	2.3e-13						40550.8	VE01_01585-T1
VE01_03332-T1	2	2	6.3	6.43	2.6e-11						1	1	2.4	6.65	1.1e-11	56091.3	VE01_03332-T1
VE01_05359-T1	1	1	6.1	4.78	5.6e-09	2	2	6.1	6.53	1.7e-11	2	2	6.1	6.06	1.3e-10	19759.5	VE01_05359-T1
VE01_08977-T1	2	2	18.3	6.31	4.5e-11	2	2	18.3	5.6	9.2e-10	1	1	8.3	3.98	1.6e-07	12942.9	VE01_08977-T1
VE01_04627-T1	2	2	4.3	6.03	1.5e-10						2	2	4.3	6.47	2.3e-11	48649.4	VE01_04627-T1
VE01_01353-T1		1				3	3	18	4.33	4.3e-08	2	2	16.2	4.14	6.8e-08	11846.4	VE01_01353-T1
VE01_02923-T1	2	2	9	5.63	8e-10	1	1	4.5	3.24	8.6e-08	1	1	4.5	5.03	1.1e-08	23739.5	VE01_02923-T1
VE01_00498-T1	2	3	7.3	6.3	4.7e-11	1	1	4.2	4.56	2.1e-09	1	6	4.2	4.55	6.7e-10	27099.7	VE01_00498-T1
VE01_01196-T1	1	1	8.2	2.99	3.6e-06	2	3	24.5	7.01	2.2e-12		1				11772.8	VE01_01196-T1
VE01_08337-T1						3	3	21	2.72	8.4e-07	3	3	21	4.34	5.7e-09	13334.2	VE01_08337-T1
VE01_05361-T1	1	1	6.3	9.55	4.4e-17	1	1	6.3	9.39	8.7e-17						40229	VE01_05361-T1
VE01_07945-T1						1	1	3.3	4.67	4.9e-08	2	2	6	4.9	1.8e-08	40158.1	VE01_07945-T1
VE01_01840-T1	2	2	21.9	5.54	6.3e-11	1	1	5.9	4.04	1.4e-07	1	1	5.9	3.22	5.5e-07	22886.8	VE01_01840-T1
VE01_04636-T1	1	1	6.4	6.24	6e-11						1	1	8.8	8.89	7.3e-16	16181.7	VE01_04636-T1
VE01_06014-T1	1	1	4.9	4	8.4e-07	1	1	8.7	8.87	8e-16						19593.3	VE01_06014-T1
VE01_07701-T1	1	1	21.5	8.4	6.1e-15	1	1	21.5	6.36	3.7e-11	1	2	21.5	8.86	8.5e-16	6829.2	VE01_07701-T1
VE01_02532-T1	2	2	4.6	5.67	6.8e-10	1	1	3.2	5.65	7.4e-10						47198.6	VE01_02532-T1
VE01_05383-T1	1	1	10.3	8.74	1.4e-15	1	1	10.3	7.17	1.1e-12						16775.7	VE01_05383-T1
VE01_00676-T1	1	1	15.7	7.7	1.2e-13	1	2	15.7	8.38	6.5e-15	1	1	15.7	7.98	3.6e-14	11410.2	VE01_00676-T1
VE01_08259-T1	1	1	2.3	5.35	2.2e-09	2	2	3.6	6	1.7e-10						56417.1	VE01_08259-T1
VE01_05013-T1						2	2	17.6	4.17	4e-07	1	1	10.2	3.99	8.8e-07	12100.8	VE01_05013-T1
VE01_05710-T1	1	1	1.8	8	3.3e-14	1	1	0.8	2.17	1.4e-06	1	1	0.8	3.02	1.3e-07	110358	VE01_05710-T1
VE01_00313-T1	1	1	1.6	4.55	5.2e-08	2	2	3.7	5.37	2.4e-09						72662.3	VE01_00313-T1
VE01_04077-T1	1	1	9.3	5.82	3.6e-10	1	1	6	7.63	1.6e-13						34066.1	VE01_04077-T1
VE01_03523-T1	1	1	10.8	4.41	1.4e-07						2	2	16.2	4.02	2.6e-07	11956.8	VE01_03523-T1
VE01_03554-T1	1	1	4.5	6.46	2.4e-11	1	1	4.5	6.4	3e-11	1	1	4.5	5.68	6.6e-10	23379.2	VE01_03554-T1
VE01_05784-T1						1	1	2.9	3.5	3.4e-07	2	2	4.4	4.43	9.8e-09	41868.8	VE01_05784-T1
VE01_06449-T1	1	1	1.8	6.11	1.1e-10						1	1	1.8	6.08	1.2e-10	71877	VE01_06449-T1
VE01_08855-T1						1	1	2.8	5.88	2.8e-10	1	1	2.8	5.6	9.3e-10	56051.4	VE01_08855-T1
VE01_06215-T1	1	1	7.9	5.48	1.3e-09	1	1	7.9	5.04	2.9e-09	1	1	7.9	5.2	5e-09	13426.2	VE01_06215-T1
VE01_03394-T1						1	1	6.6	5.29	3.5e-09	1	1	6.6	2.94	2.4e-07	24546.7	VE01_03394-T1
VE01_07383-T1	1	1	2.4	4.46	9.8e-08						1	1	2.4	3.32	2.8e-07	46479.7	VE01_07383-T1
VE01_09066-T1	1	1	4.2	4.16	7.9e-08		1				1	1	4.2	4.45	7.7e-09	28706.8	VE01_09066-T1
VE01_03121-T1						1	1	13.8	3.28	8.1e-09	1	1	6.9	3.11	1e-06	17292.9	VE01_03121-T1
VE01_09076-T1						1	1	8.8	3.02	8.8e-08	1	1	8.8	2.93	6.3e-07	11094	VE01_09076-T1
VE01_07429-T1						4	4	13.5	3.15	1.3e-06	2	2	6.6	2.97	1.2e-06	30408.2	VE01_07429-T1
VE01_07752-T1	5	5	15.1	4.35	1.9e-07	3	3	6.9	5.02	1.1e-08	11	12	38.2	8.57	3e-15	26695.9	VE01_07752-T1
VE01_06111-T1	7	8	20.6	7.86	6.1e-14	5	5	17.8	7.21	9.4e-13	6	7	17.8	6.86	4.2e-12	36356.4	VE01_06111-T1
